# Supplementary figures and images for: MicroRNAs as Prognostic Markers in Acute Coronary Syndrome Patients—A Systematic Review
Source: MDPI journal article supplement (doi:10.3390/cells8121572), 2019-12-04

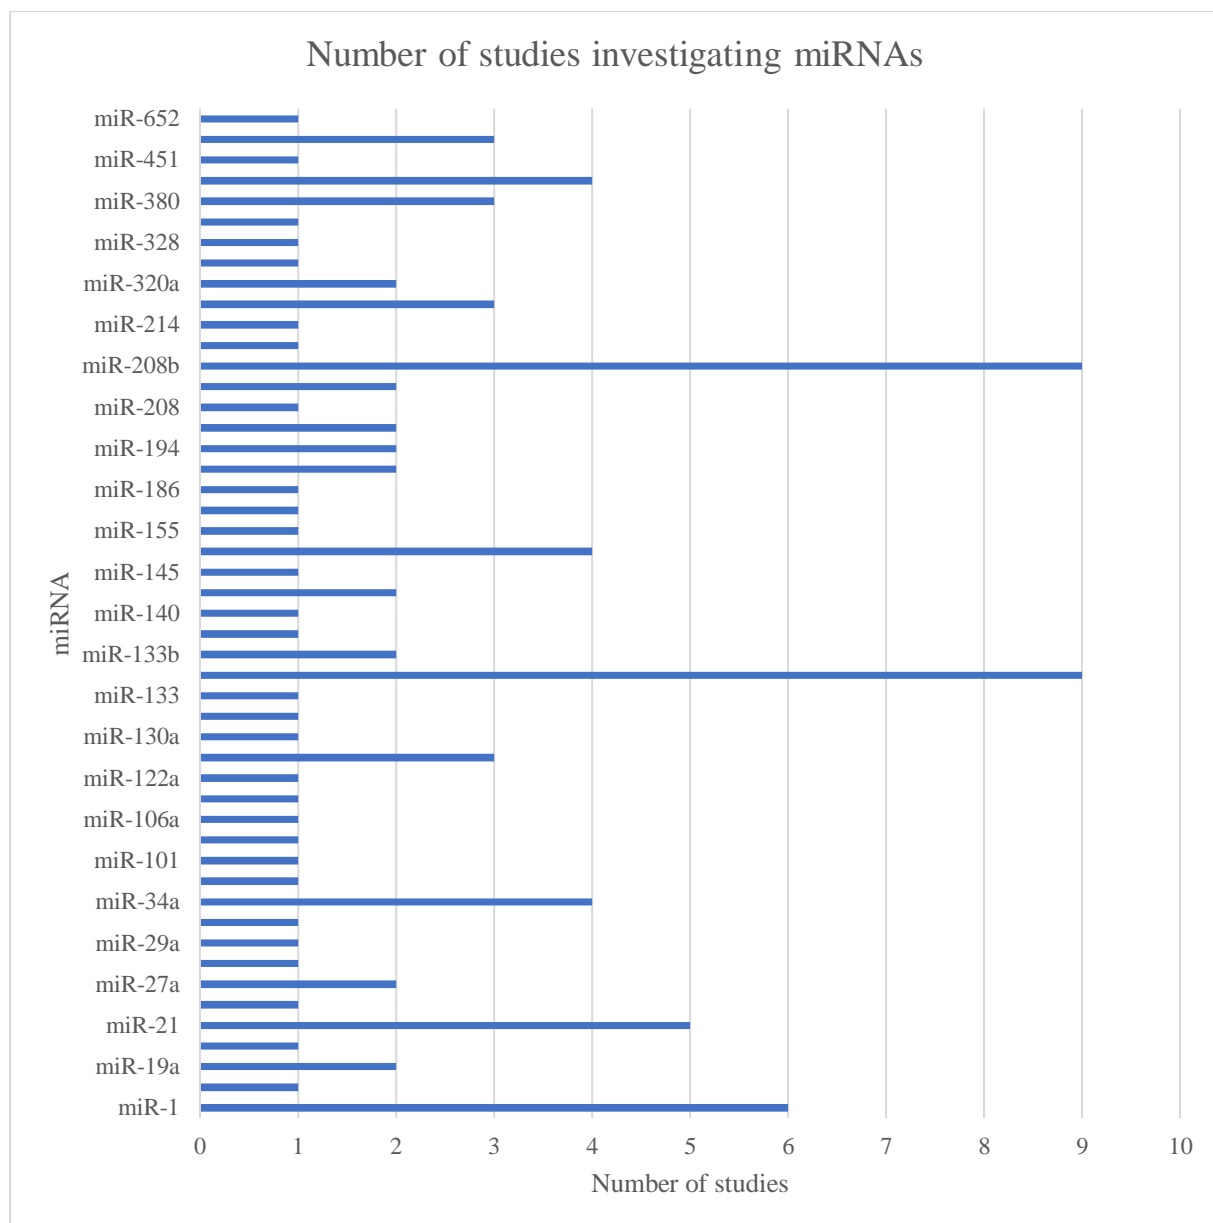

Supplement: s1 [file s1]
